# Supplementary material
Source: PubMed Central journal article supplement (PMC129458)

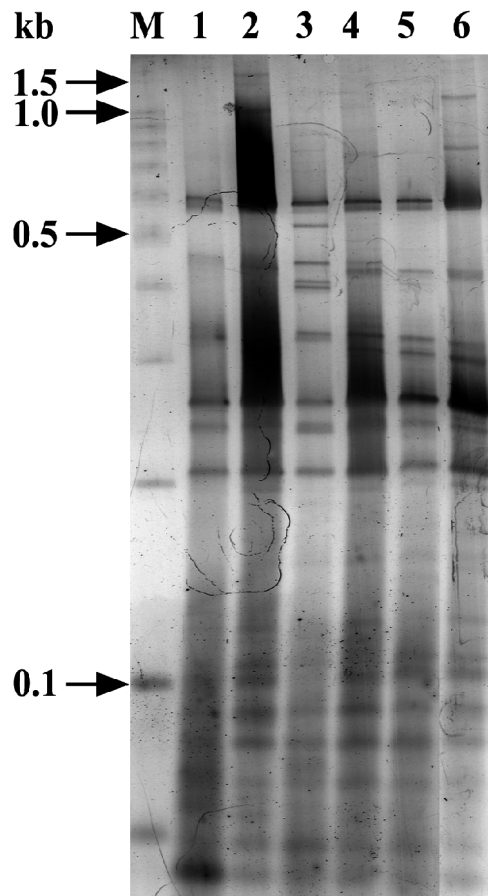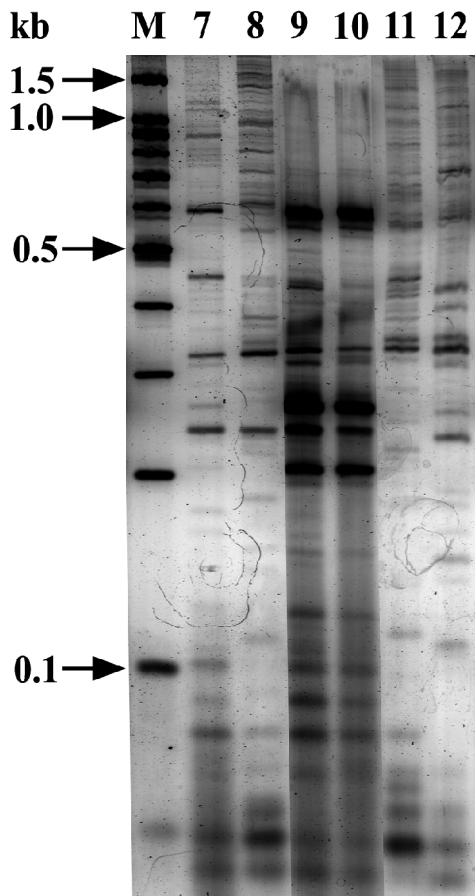

Supplement: pnas_192426499_7.pdf [file pnas_192426499_7.pdf]

**Chromosome II**

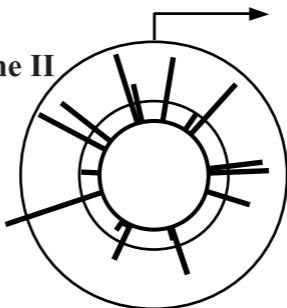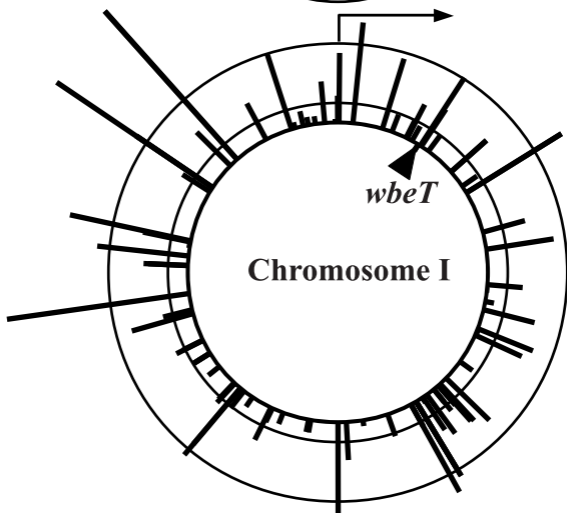

Supplement: pnas_192426499_8.pdf [file pnas_192426499_8.pdf]
